# Supplementary material for: Global Trends in Antimicrobial Use in Food Animals from 2017 to 2030
Source: PubMed Central journal article supplement (PMC7766021; doi:10.3390/antibiotics9120918), 2020-12-17
Supplement: antibiotics-09-00918-s001.pdf [file antibiotics-09-00918-s001.pdf]

## Supplementary Materials

### Comparisons of Estimates Using 2010 Sales Data

Using antimicrobial sales data from 2010, we previously estimated that 105,596 tonnes of veterinary antimicrobials would be consumed in 2030. In this paper, we estimated that 104,079 tonnes (95% CI: [69,062, 172,711]) of veterinary antimicrobials would be consumed in 2030. This corresponds to an expected consumption decrease of 1.4% in 2030. However, these differences are not significant as the point estimate generated from 2010 sales data is included in our current 95% confidence interval.

In 2010, the five countries with the largest projections of antimicrobial consumption were China (23%), USA (13%), Brazil (9%), India (3%), and Germany (3%). In our current paper, the top five countries for 2017 are China (40%), Brazil (7%), USA (6%), Thailand (4%), and India (2%). While the order of the top five countries has changed along with the overall percentages of the worldwide consumption attributed to them with seven years of new data, four out of the five remain consistent. In our current paper, Germany is no longer in the top five estimated consumers.

In 2010, pigs used the most antimicrobials, averaging at 172 mg/PCU. In 2017, we estimated that pigs averaged 193 mg/PCU. Using this metric, we can see that AMU in pigs is not increasing solely due to an increasing number of pigs, but because more antimicrobials are being used per pig. 2010 sales data indicated that cattle only used 45 mg/PCU of antimicrobials. 2017 sales data indicated that cattle used only 42 mg/PCU, suggesting AMU in cattle may be slowly decreasing. The mean use for chickens in 2010 was 148 mg/PCU. This is much higher than our 2017 predicted mean of 68 mg/PCU. This discrepancy could result from the wide range of AMU in chicken use noted previously [1].

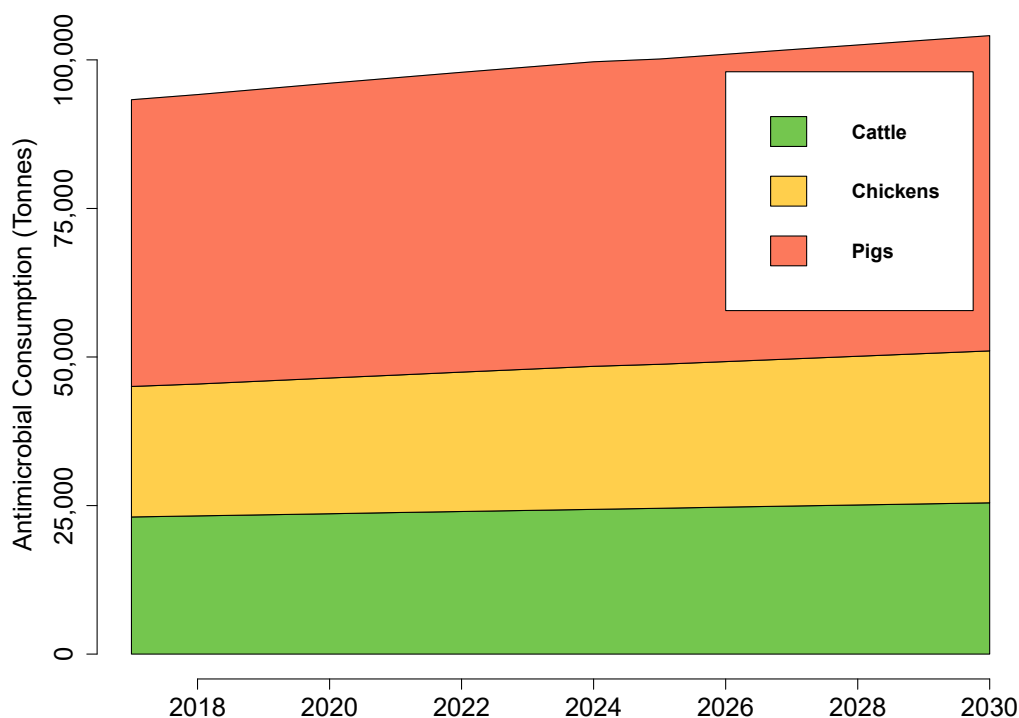

**Figure S1.** The estimated global increase of antimicrobial use from 2017 to 2030 by animal type.

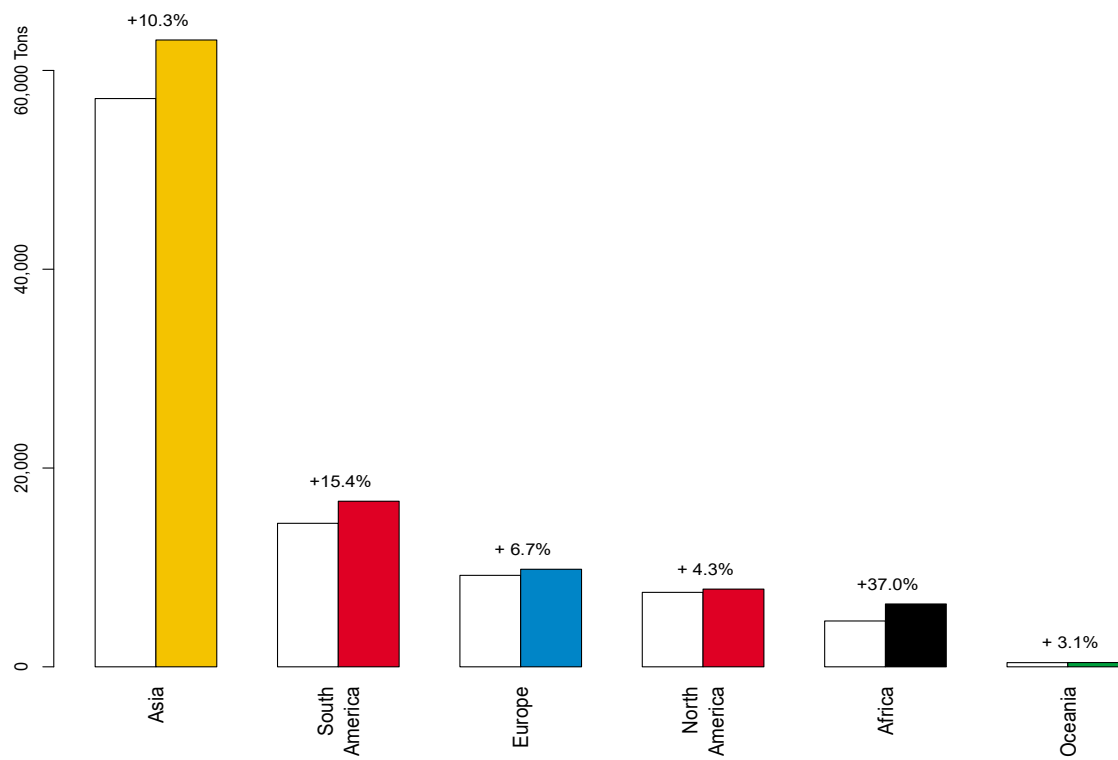

**Figure S2.** The estimated increase in antimicrobial use (in tonnes) by continent in 2017 and 2030.

Table S1. Antimicrobial sales data sources.

| Country   | IS O3 | Year | Animal Type | Tetracyclines | Ampenicols | Penicillins | Cephalosporins | Sulfonamides | Trimethoprim | Macrolides & Lincosamides | Aminoglycosides | Quinolones | Pleuromutilins | Polymyxins | Other Antibiotics | Total Antibiotics | Source                                                     |
|-----------|-------|------|-------------|---------------|------------|-------------|----------------|--------------|--------------|---------------------------|-----------------|------------|----------------|------------|-------------------|-------------------|------------------------------------------------------------|
| Australia | AUS   | 2010 | Pigs        |               |            |             |                |              |              |                           |                 |            |                |            |                   | 104200            | APVMA                                                      |
| Australia | AUS   | 2010 | Chicken     |               |            |             |                |              |              |                           |                 |            |                |            |                   | 163100            | APVMA                                                      |
| Australia | AUS   | 2010 | Cattle      |               |            |             |                |              |              |                           |                 |            |                |            |                   | 22510             | APVMA                                                      |
| Australia | AUS   | 2010 | All         | 58000         | 900        | 26370       | 300            | 13300        |              | 71330                     | 5620            |            |                |            | 126840            | 305050            | APVMA                                                      |
| Austria   | AUT   | 2017 | All         | 24897         | 382        | 8204        | 239            | 3339         | 668          | 3147                      | 1240            | 477        | 286            | 1622       | 191               | 44692             | EMA                                                        |
| Belgium   | BEL   | 2017 | All         | 56552         | 3030       | 83145       | 505            | 36860        | 7406         | 18682                     | 1010            | 505        | 842            | 3535       | 8920              | 220992            | EMA                                                        |
| Belgium   | BEL   | 2018 | Pigs        | 28400         | 1300       | 46300       | 10             | 20800        |              | 9300                      | 200             | 10         |                | 2900       | 1400              | 110620            | BelVet                                                     |
| Belgium   | BEL   | 2018 | Chicken     | 1800          | 10         | 10200       |                | 3700         |              | 7000                      |                 | 390        |                | 100        |                   | 23200             | BelVet                                                     |
| Bulgaria  | BGR   | 2017 | All         | 17086         | 3035       | 9255        | 44             | 2960         | 412          | 9817                      | 2286            | 2323       | 824            | 1124       | 412               | 49578             | EMA                                                        |
| Chile     | CHL   | 2018 | All         | 76661         | 316582     | 33068       | 1306           | 12182        |              | 81587                     | 14633           | 11295      | 56521          |            | 27464             | 631299            | Agricultural and Livestock Service Ministry of Agriculture |
| China     | CHN   | 2017 | All         | 19262851      | 2992247    | 4561812     |                |              |              | 4079192                   |                 |            |                |            | 11070894          | 41966996          | Ministry of Agriculture                                    |

|                    |             |          |             |         |      |              |      |         |      |         |       |              |      |              |              |                 |            |
|--------------------|-------------|----------|-------------|---------|------|--------------|------|---------|------|---------|-------|--------------|------|--------------|--------------|-----------------|------------|
| China              | CH<br>N     | 20<br>13 | Chic<br>ken | 1130000 |      | 363000<br>0  |      | 2450000 |      | 2070000 |       | 487000<br>0  |      | 397000<br>0  | 181200<br>00 | Zhang<br>et al. |            |
| China              | CH<br>N     | 20<br>13 | Pigs        | 3300000 |      | 106000<br>00 |      | 3520000 |      | 5840000 |       | 139000<br>00 |      | 113000<br>00 | 484600<br>00 | Zhang<br>et al. |            |
| Croatia            | HR<br>V     | 20<br>17 | All         | 7006    | 532  | 6592         | 118  | 1774    | 266  | 2011    | 975   | 769          | 89   | 946          | 59           | 21137           | EMA        |
| Cyprus             | CY<br>P     | 20<br>17 | All         | 18634   | 1804 | 8710         | 46   | 3372    | 655  | 7561    | 451   | 301          | 2513 | 1117         | 269          | 45433           | EMA        |
| Canada             | CA<br>N     | 20<br>15 | Chic<br>ken | 25.77   |      | 41.85        | 0    | 79.49   |      | 20.78   | 3.44  | 0            |      | 274.74       | 446.07       | CIPAR<br>S      |            |
| Canada             | CA<br>N     | 20<br>17 | All         | 501582  |      | 107548       | 6795 | 61392   |      | 140211  | 11477 | 640          |      | 118971       | 948616       | CIPAR<br>S      |            |
| Czech_Rep<br>ublic | CZ<br>E     | 20<br>17 | All         | 13030   | 970  | 11991        | 555  | 7555    | 832  | 2495    | 1802  | 1324         | 2980 | 416          | 277          | 44227           | EMA        |
| Denmark            | D<br>N<br>K | 20<br>17 | All         | 18941   | 1439 | 28531        | 72   | 9111    | 1678 | 15824   | 5275  | 743          | 8871 | 480          | 3117         | 94082           | EMA        |
| Denmark            | D<br>N<br>K | 20<br>17 | Pigs        | 15212   | 381  | 24643        | 0    | 6615    |      | 13684   | 6240  | 0            | 7669 |              | 315          | 74759           | DANM<br>AP |
| Denmark            | D<br>N<br>K | 20<br>17 | Cattl<br>e  | 1514    | 737  | 8163         | 63   | 922     |      | 240     | 723   | 0            | 0    |              | 4            | 12366           | DANM<br>AP |
| Denmark            | D<br>N<br>K | 20<br>17 | Chic<br>ken | 483     | 5    | 613          | 0    | 85      |      | 237     | 65    | 0            | 0    |              | 0            | 1488            | DANM<br>AP |
| Estonia            | ES<br>T     | 20<br>17 | All         | 1553    | 55   | 2407         | 111  | 333     | 67   | 288     | 366   | 144          | 688  | 122          | 133          | 6267            | EMA        |
| Finland            | FI<br>N     | 20<br>13 | Chic<br>ken |         |      |              |      |         |      |         |       |              |      |              |              | 36.5            |            |
| Finland            | FI<br>N     | 20<br>17 | All         | 2284    | 102  | 4466         | 20   | 1827    | 355  | 660     | 51    | 51           | 0    | 0            | 0            | 9816            | EMA        |

|         |             |          |             |        |       |        |       |        |       |        |       |       |       |       |       |             |                     |       |
|---------|-------------|----------|-------------|--------|-------|--------|-------|--------|-------|--------|-------|-------|-------|-------|-------|-------------|---------------------|-------|
| France  | FR<br>A     | 20<br>17 | All         | 188634 | 5631  | 65459  | 1549  | 90094  | 16189 | 35896  | 49974 | 4927  | 4223  | 15485 | 5631  | 483692      | EMA                 |       |
| France  | FR<br>A     | 20<br>17 | Cattl<br>e  |        |       |        | 0     |        |       | 0      |       | 0     |       |       |       | 131010      | ANSES               |       |
| France  | FR<br>A     | 20<br>17 | Pigs        |        |       |        | 0     |        |       | 0      |       | 0     |       |       |       | 181270      | ANSES               |       |
| France  | FR<br>A     | 20<br>17 | Chic<br>ken |        |       |        | 0     |        |       | 0      |       | 0     |       |       |       | 96420       | ANSES               |       |
| Germany | DE<br>U     | 20<br>17 | All         | 198863 | 5165  | 297004 | 4305  | 61122  | 7748  | 66287  | 16357 | 9470  | 16357 | 73175 | 12052 | 767905      | EMA                 |       |
| Greece  | GR<br>C     | 20<br>17 | All         | 59282  | 870   | 23116  | 136   | 10315  | 1616  | 4474   | 5344  | 8203  | 1119  | 1616  | 621   | 116712      | EMA                 |       |
| Hungary | H<br>U<br>N | 20<br>17 | All         | 59899  | 2236  | 36001  | 462   | 5396   | 1079  | 8788   | 2313  | 6861  | 11564 | 11486 | 308   | 146393      | EMA                 |       |
| Iceland | ISL         | 20<br>17 | All         | 38     | 0     | 413    | 1     | 38     | 6     | 0      | 75    | 1     | 0     | 0     | 0     | 572         | EMA                 |       |
| Iran    | IR<br>N     | 20<br>10 | All         |        |       |        |       |        |       |        |       |       |       |       |       | 180689      | Aalipo<br>ur et al. |       |
| Iran    | IR<br>N     | 20<br>10 | Cattl<br>e  |        |       |        |       |        |       |        |       |       |       |       |       | 119969      | Aalipo<br>ur et al. |       |
| Iran    | IR<br>N     | 20<br>10 | Chic<br>ken |        |       |        |       |        |       |        |       |       |       |       |       | 607207      | Aalipo<br>ur et al. |       |
| Ireland | IR<br>L     | 20<br>15 | Cattl<br>e  | 0      |       | 925.1  | 593.9 | 1.4    |       | 4.2    | 320   | 0     |       |       | 44.5  | 1889.1      | More et<br>al.      |       |
| Ireland | IR<br>L     | 20<br>17 | All         | 41436  | 2960  | 20507  | 845   | 16701  | 1268  | 7399   | 5285  | 846   |       |       | 1057  | 98304       | EMA                 |       |
| Italy   | IT<br>A     | 20<br>17 | All         | 304854 | 23183 | 271625 | 2319  | 130983 | 15842 | 165371 | 42888 | 22410 | 35547 | 20092 | 22410 | 105752<br>4 | EMA                 |       |
| Japan   | JP<br>N     | 20<br>17 | All         | 347055 | 27116 | 99369  | 3436  | 98195  | 13077 | 165954 | 44367 | 7677  |       |       |       | 36187       | 842433              | JVARM |
| Japan   | JP<br>N     | 20<br>17 | Cattl<br>e  | 19242  | 3608  | 16723  | 2949  | 9099   | 956   | 2016   | 4457  | 1336  |       |       |       | 173         | 60559               | JVARM |

|            |         |          |         |        |        |        |       |       |       |        |       |       |       |       |       |         |                                    |
|------------|---------|----------|---------|--------|--------|--------|-------|-------|-------|--------|-------|-------|-------|-------|-------|---------|------------------------------------|
| Japan      | JP<br>N | 20<br>17 | Pigs    | 244384 | 20717  | 45446  | 487   | 65271 | 10910 | 77788  | 29548 | 1944  |       |       | 35546 | 532041  | JVARM                              |
| Japan      | JP<br>N | 20<br>17 | Chicken | 22402  | 1021   | 21835  | 0     | 8534  | 1152  | 11550  | 10083 | 2952  |       |       | 0     | 79529   | JVARM                              |
| Latvia     | LV<br>A | 20<br>17 | All     | 1463   | 18     | 1499   | 88    | 194   | 35    | 617    | 617   | 196   | 846   | 229   | 71    | 5873    | EMA                                |
| Lithuania  | LT<br>U | 20<br>17 | All     | 1665   | 100    | 4529   | 100   | 2364  | 533   | 700    | 533   | 269   | 266   | 233   | 300   | 11592   | EMA                                |
| Luxembourg | LU<br>X | 20<br>17 | All     | 744    | 44     | 372    | 38    | 312   | 60    | 71     | 55    | 45    | 11    | 11    | 109   | 1872    | EMA                                |
| Korea      | KO<br>R | 20<br>17 | All     | 254502 | 114716 | 280896 | 11312 | 88679 |       | 107462 | 50503 | 47472 | 24381 |       | 23667 | 1003590 | Animal and Plant Quarantine Agency |
| Korea      | KO<br>R | 20<br>17 | Cattle  | 16259  | 2916   | 43264  | 4123  | 2612  | 317   | 7124   | 30    | 6484  | 0     | 1382  | 100   | 84611   | Animal and Plant Quarantine Agency |
| Korea      | KO<br>R | 20<br>17 | Pigs    | 66766  | 86512  | 161957 | 5056  | 57401 | 3839  | 74829  | 9745  | 25028 | 21779 | 13905 | 225   | 527042  | Animal and Plant Quarantine Agency |
| Korea      | KO<br>R | 20<br>17 | Chicken | 14179  | 17929  | 34625  | 1792  | 11655 | 2072  | 10998  | 3403  | 5092  | 2602  | 7129  | 210   | 111686  | Animal and Plant Quarantine Agency |

|             |         |          |         |        |      |        |        |       |      |       |       |       |       |       |         |        |                                   |
|-------------|---------|----------|---------|--------|------|--------|--------|-------|------|-------|-------|-------|-------|-------|---------|--------|-----------------------------------|
| Malta       | M<br>LT | 20<br>17 | All     | 183    | 20   | 177    | 4      | 168   | 22   | 181   | 83    | 223   | 407   | 67    | 228     | 1763   | EMA                               |
| Netherlands | NL<br>D | 20<br>17 | All     | 74498  | 4677 | 42093  | 167    | 28730 | 5345 | 25222 | 1670  | 3341  | 1002  | 1002  | 668     | 188415 | EMA                               |
| Netherlands | NL<br>D | 20<br>17 | Chicken | 2180   | 0    | 6225   | 0      | 2439  |      | 1597  | 110   | 1059  | 30    | 85    | 28      | 13753  | SDA                               |
| Netherlands | NL<br>D | 20<br>17 | Pigs    | 30598  | 1315 | 16198  | 0      | 13135 |      | 7270  | 32    | 223   | 660   | 767   | 546     | 70744  | SDA                               |
| Netherlands | NL<br>D | 20<br>17 | Cattle  | 30824  | 3460 | 12891  | 26     | 12687 |      | 16269 | 601   | 1951  | 0     | 1108  | 1090    | 80907  | SDA                               |
| New_Zealand | NZ<br>L | 20<br>08 | Cattle  | 28.7   | 0    | 7115.9 | 1019.2 | 150.5 |      | 53.3  | 171.8 | 0.1   | 0     |       | 21.4    | 8560.8 | New Zealand Food Safety Authority |
| New_Zealand | NZ<br>L | 20<br>11 | Sheep   |        |      |        |        |       |      |       |       |       |       |       | 2500    |        | New Zealand Food Safety Authority |
| New_Zealand | NZ<br>L | 20<br>17 | All     | 6821   | 0    | 19402  | 1677   | 3971  |      | 7316  | 1557  | 42.5  | 98    | 0.4   | 29529.7 | 70406  | New Zealand Food Safety Authority |
| Norway      | N<br>OR | 20<br>17 | All     | 186    | 372  | 2978   | 19     | 1303  | 186  | 37    | 372   | 391   | 37    | 0     | 19      | 5900   | EMA                               |
| Poland      | PO<br>L | 20<br>17 | All     | 217418 | 8170 | 245560 | 1362   | 32227 | 6355 | 88964 | 21333 | 50428 | 38128 | 34043 | 5447    | 749435 | EMA                               |
| Portugal    | PR<br>T | 20<br>17 | All     | 44990  | 45   | 35170  | 701    | 5812  | 1202 | 16842 | 2705  | 3617  | 6313  | 10922 | 1703    | 130022 | EMA                               |

|          |         |          |         |        |       |        |      |        |       |        |       |       |       |       |      |             |                                                                              |
|----------|---------|----------|---------|--------|-------|--------|------|--------|-------|--------|-------|-------|-------|-------|------|-------------|------------------------------------------------------------------------------|
| Romania  | RO<br>U | 20<br>17 | All     | 73192  | 11372 | 53071  | 612  | 7873   | 1750  | 42574  | 31784 | 13122 | 13997 | 11956 | 1750 | 263053      | EMA                                                                          |
| Slovakia | SV<br>K | 20<br>17 | All     | 4157   | 112   | 2562   | 180  | 1348   | 157   | 2292   | 427   | 768   | 1191  | 382   | 337  | 13913       | SMA                                                                          |
| Slovenia | SV<br>N | 20<br>17 | All     | 791    | 129   | 4083   | 55   | 441    | 110   | 55     | 405   | 533   | 55    | 18    | 37   | 6712        | EMA                                                                          |
| Spain    | ES<br>P | 20<br>17 | All     | 482620 | 47421 | 447437 | 1759 | 113198 | 19121 | 416834 | 93312 | 39773 | 56599 | 33653 | 9943 | 176167<br>0 | EMA                                                                          |
| Sweden   | SW<br>E | 20<br>08 | Cattle  | 238    | 0     | 746    | 8    | 0      | 6     | 10     | 168   | 20    | 0     | 0     | 0    | 1196        | SVA<br>Nation<br>al Food<br>Veterin<br>ary<br>Institut<br>e of<br>Swede<br>n |
| Sweden   | SW<br>E | 20<br>08 | Pigs    | 840    | 0     | 1218   | 0    | 365    | 72    | 597    | 200   | 18    | 568   | 0     | 0    | 3878        | SVA<br>Nation<br>al Food<br>Veterin<br>ary<br>Institut<br>e of<br>Swede<br>n |
| Sweden   | SW<br>E | 20<br>08 | Chicken | 5      | 0     | 57     | 0    | 0      | 0     | 29     | 0     | 3     | 0     | 0     | 0    | 94          | SVA<br>Nation<br>al Food<br>Veterin<br>ary<br>Institut<br>e of               |



|             |      |       |         |         |       |        |       |        |       |        |        |       |        |             |             |                                    |                    |
|-------------|------|-------|---------|---------|-------|--------|-------|--------|-------|--------|--------|-------|--------|-------------|-------------|------------------------------------|--------------------|
|             |      |       |         |         |       |        |       |        |       |        |        |       |        |             |             | Sweden                             |                    |
| Sweden      | SW E | 20 17 | All     | 521     | 21    | 6580   | 210   | 1678   | 326   | 514    | 357    | 26    | 78     | 0           | 10311       | EMA                                |                    |
| Switzerland | CH E | 20 17 | All     | 6851    | 341   | 9143   | 163   | 10181  | 591   | 1574   | 2462   | 207   | 327    | 181         | 32021       | ARCH-VET                           |                    |
| Thailand    | TH A | 20 17 | All     | 711473  | 66    | 992425 | 6655  | 256309 | 53173 | 365960 | 147856 | 65758 | 300258 | 162681      | 628847      | 369146<br>1                        | Ministry of Health |
| UK          | GB R | 20 17 | All     | 96200   |       | 61000  | 4978  | 20000  | 3900  | 23300  | 17500  | 1210  |        | 20100       | 248188      | UK Veterinary Medicine Directorate |                    |
| UK          | GB R | 20 17 | Chicken | 3300    |       | 8200   | 0     | 900    |       | 1800   |        | 38    |        | 162         | 14400       | UK Veterinary Medicine Directorate |                    |
| USA         | US A | 20 17 | Cattle  | 1560542 |       | 96936  | 23512 | 196902 |       | 274479 | 124675 | 0     |        | 56793       | 233383<br>9 | FDA                                |                    |
| USA         | US A | 20 17 | Chicken | 346597  |       | 423689 | 0     | 36136  |       | 12134  | 44227  | 0     |        | 76096       | 938878      | FDA                                |                    |
| USA         | US A | 20 17 | Pigs    | 1579145 |       | 0      | 0     | 31024  |       | 318145 | 63602  | 0     |        | 31016       | 202293<br>2 | FDA                                |                    |
| USA         | US A | 20 17 | All     | 3535701 | 49321 | 690889 | 29369 | 274112 |       | 621291 | 259184 | 22904 |        | 105574<br>6 | 653851<br>7 | FDA                                |                    |

## Citations

1. Van Boeckel, T.P.; Brower, C.; Gilbert, M.; Grenfell, B.T.; Levin, S.A.; Robinson, T.P.; Teillant, A.; Laxminarayan, R. Global trends in antimicrobial use in food animals. *Proc. Natl. Acad. Sci.* **2015**, *112*, 5649, doi:10.1073/pnas.1503141112.

**Publisher's Note:** MDPI stays neutral with regard to jurisdictional claims in published maps and institutional affiliations.

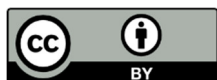

© 2020 by the authors. Licensee MDPI, Basel, Switzerland. This article is an open access article distributed under the terms and conditions of the Creative Commons Attribution (CC BY) license (<http://creativecommons.org/licenses/by/4.0/>).
